# Supplementary material
Source: publisher figshare collection journal article supplement (https://frontiersin.figshare.com/ndownloader/files/25545764)
Supplement: Supplementary file [file 25545764]

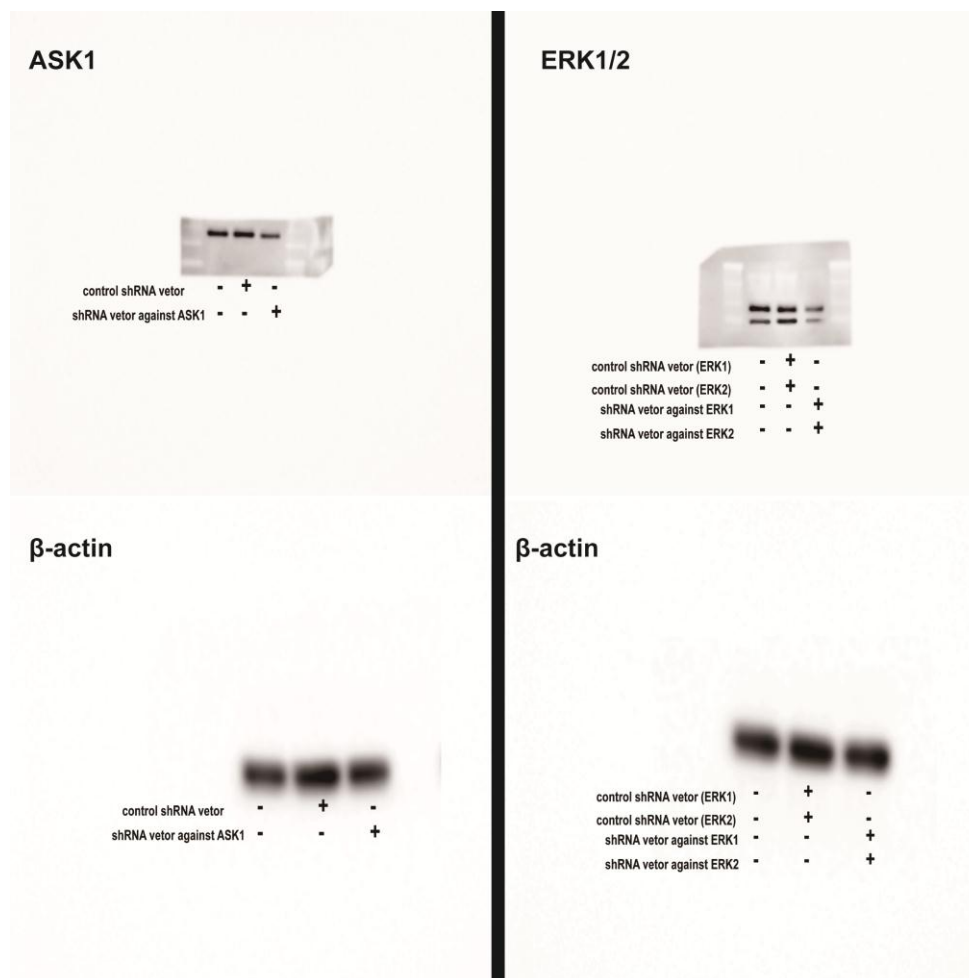

Figure S1 Transfection of HUVEC with corresponding shRNA to inhibit ASK1 and ERK1/2.



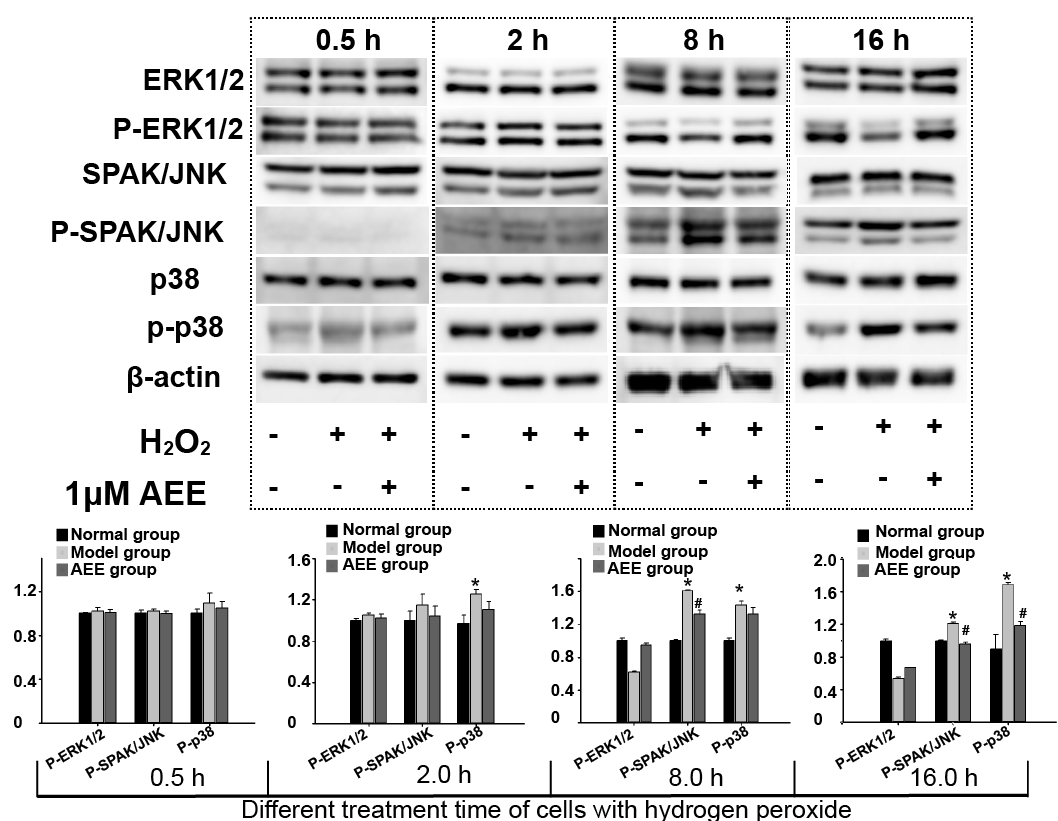

Figure S2 The changes in the activation of JNK, p38 and ERK following exposure to  $H_2O_2$  for different time.\* $p < 0.05$  compared with the normal group; # $p < 0.05$  compared with the  $H_2O_2$  group. “+”: with the treatments in the HUVECs; “-”: without the treatments in the HUVECs.



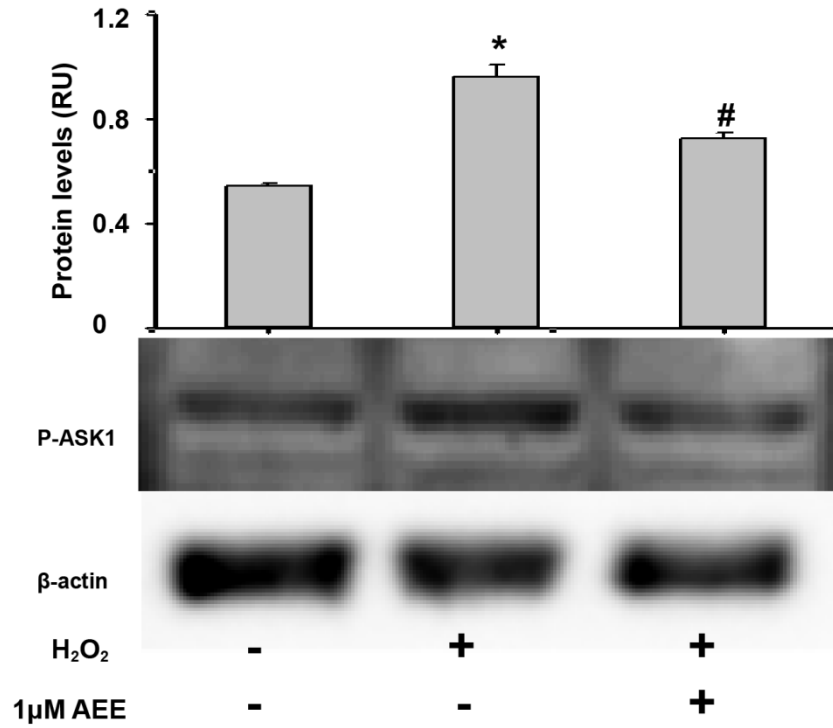

Figure S3 AEE ameliorated H<sub>2</sub>O<sub>2</sub>-induced changes of P-ASK1. Values are presented as the means  $\pm$  SD where applicable (n = 6); all data were normalized to the corresponding control and reported in relative units (RU). \*p < 0.05 compared with the normal group, #p < 0.05 compared with the H<sub>2</sub>O<sub>2</sub> group. “+”: with the treatments in the HUVECs; “-”: without the treatments in the HUVECs.



**Table S1.** The level of LDH, CK, AST, ALT, BUN and Cr in rat serum

(Mean  $\pm$  SD)

| Group           | LDH<br>(U/L)              | CK<br>(U/L)                   | AST<br>(U/L)                 | ALT<br>(U/L)                  | BUN<br>(mM)                 | Cr<br>( $\mu$ M)            |
|-----------------|---------------------------|-------------------------------|------------------------------|-------------------------------|-----------------------------|-----------------------------|
| control         | 306 $\pm$ 17              | 201.6 $\pm$ 31.5              | 25.4 $\pm$ 3.2               | 94.2 $\pm$ 7.3                | 5.7 $\pm$ 1.9               | 37.9 $\pm$ 2.6              |
| PQ              | 721 $\pm$ 25*             | 653.7 $\pm$ 43.8*             | 72.5 $\pm$ 9.5*              | 192.4 $\pm$ 5.7*              | 22.1 $\pm$ 4.7*             | 89.5 $\pm$ 4.5*             |
| 27 mg/kg AEE+PQ | 608 $\pm$ 43 <sup>#</sup> | 602.2 $\pm$ 24.5              | 64.3 $\pm$ 8.7 <sup>#</sup>  | 168.5 $\pm$ 4.9 <sup>#</sup>  | 17.4 $\pm$ 3.2              | 79.7 $\pm$ 5.9              |
| 54 mg/kg AEE+PQ | 506 $\pm$ 31 <sup>#</sup> | 442.7 $\pm$ 13.8 <sup>#</sup> | 47.5 $\pm$ 7.6 <sup>#</sup>  | 149.41 $\pm$ 9.2 <sup>#</sup> | 13.7 $\pm$ 2.1 <sup>#</sup> | 59.8 $\pm$ 3.7 <sup>#</sup> |
| 108mg/kg AEE+PQ | 572 $\pm$ 52 <sup>#</sup> | 496.9 $\pm$ 47.8 <sup>#</sup> | 54.8 $\pm$ 12.5 <sup>#</sup> | 155.5 $\pm$ 11.5 <sup>#</sup> | 16.5 $\pm$ 2.0 <sup>#</sup> | 66.2 $\pm$ 4.8 <sup>#</sup> |

\*p < 0.05 compared with the normal group, #p < 0.05 compared with the PQ group.

LDH: Lactic dehydrogenase; CK: Creatine kinase; AST: Aspartate transaminase;

ALT: Alanine aminotransferase; BUN: Blood urea nitrogen; Cr: Creatinine.
